# Supplementary material
Source: publisher figshare collection journal article supplement (https://frontiersin.figshare.com/ndownloader/files/20024543)
Supplement: Supplementary file 1 [file 20024543]

**Supplementary:**

1. **Calculated Born Effective Charge Tensor Of DIPAB**

**Table S1:** Calculated Born effective charge tensor of ferroelectric DIPAB calculated by applying a homogenous electric field = + + eV/Å.

| Atomic Species |  |  |  |  |  |  |  |  |  |
| --- | --- | --- | --- | --- | --- | --- | --- | --- | --- |
| Br1 | -1.319 | 0.039 | 0.161 | 0.058 | -1.366 | 0.076 | 0.188 | 0.080 | -0.850 |
| Br2 | -1.319 | -0.039 | 0.161 | -0.058 | -1.366 | -0.076 | 0.188 | -0.080 | -0.850 |
| N3 | -0.777 | -0.086 | 0.113 | -0.102 | -0.836 | 0.131 | 0.063 | 0.078 | -0.751 |
| N4 | -0.777 | 0.086 | 0.113 | 0.102 | -0.836 | -0.131 | 0.063 | -0.078 | -0.751 |
| C5 | 0.361 | -0.095 | 0.264 | -0.094 | 0.359 | -0.090 | 0.361 | -0.126 | 0.596 |
| C6 | 0.139 | 0.040 | -0.069 | 0.016 | -0.081 | 0.007 | -0.070 | 0.025 | 0.051 |
| C7 | 0.124 | 0.042 | -0.052 | 0.043 | 0.041 | -0.036 | -0.074 | -0.077 | -0.046 |
| C8 | 0.345 | -0.068 | -0.107 | -0.066 | 0.289 | 0.231 | -0.138 | 0.307 | 0.750 |
| C9 | 0.057 | 0.039 | -0.025 | 0.045 | 0.105 | -0.093 | -0.089 | -0.079 | -0.131 |
| C10 | -0.050 | 0.024 | 0.048 | 0.021 | 0.150 | -0.074 | 0.066 | -0.051 | 0.015 |
| C11 | 0.361 | 0.095 | 0.264 | 0.094 | 0.359 | 0.090 | 0.361 | 0.126 | 0.596 |
| C12 | 0.139 | -0.040 | -0.069 | -0.016 | -0.081 | -0.007 | -0.070 | -0.025 | 0.051 |
| C13 | 0.124 | -0.042 | -0.052 | -0.043 | 0.041 | 0.036 | -0.074 | 0.077 | -0.046 |
| C14 | 0.345 | 0.068 | -0.107 | 0.066 | 0.289 | -0.231 | -0.138 | -0.307 | 0.750 |
| C15 | 0.057 | -0.039 | -0.025 | -0.045 | 0.105 | 0.093 | -0.089 | 0.079 | -0.131 |
| C16 | -0.050 | -0.024 | 0.048 | -0.021 | 0.150 | 0.074 | 0.066 | 0.051 | 0.015 |
| H17 | 1.021 | 0.271 | -0.317 | 0.251 | 0.182 | -0.096 | -0.331 | -0.116 | 0.220 |
| H18 | 0.102 | 0.074 | -0.021 | 0.105 | 1.112 | -0.229 | -0.031 | -0.230 | 0.170 |
| H19 | 0.069 | -0.071 | 0.080 | -0.053 | 0.013 | 0.019 | 0.026 | 0.023 | -0.040 |
| H20 | 0.078 | 0.049 | 0.088 | 0.062 | 0.008 | -0.062 | 0.080 | -0.034 | -0.046 |
| H21 | -0.122 | -0.021 | 0.076 | -0.073 | 0.037 | 0.027 | 0.092 | 0.022 | 0.066 |
| H22 | -0.017 | 0.006 | -0.162 | 0.033 | 0.050 | 0.035 | -0.141 | 0.020 | -0.056 |
| H23 | 0.088 | 0.002 | 0.015 | 0.007 | -0.158 | 0.020 | 0.028 | 0.008 | 0.069 |
| H24 | -0.032 | 0.021 | -0.112 | -0.003 | 0.061 | 0.002 | -0.131 | 0.013 | -0.084 |
| H25 | -0.097 | -0.050 | 0.075 | -0.007 | 0.031 | -0.007 | 0.110 | 0.011 | 0.056 |
| H26 | 0.007 | -0.020 | 0.025 | -0.037 | 0.056 | 0.053 | 0.021 | 0.015 | -0.050 |
| H27 | -0.191 | 0.000 | 0.054 | 0.000 | 0.096 | 0.020 | 0.043 | 0.021 | 0.055 |
| H28 | 0.063 | -0.000 | -0.057 | 0.017 | -0.025 | -0.078 | -0.029 | -0.126 | 0.008 |
| H29 | 0.029 | 0.008 | -0.015 | -0.059 | -0.118 | 0.094 | 0.008 | 0.113 | 0.073 |
| H30 | -0.043 | 0.044 | -0.074 | 0.038 | 0.052 | 0.081 | -0.055 | 0.077 | -0.020 |
| H31 | 0.040 | -0.054 | 0.012 | -0.007 | -0.140 | 0.058 | 0.018 | 0.069 | 0.085 |
| H32 | 0.055 | 0.006 | 0.044 | -0.008 | 0.016 | -0.110 | 0.031 | -0.134 | -0.055 |
| H33 | 1.021 | -0.271 | -0.317 | -0.251 | 0.182 | 0.096 | -0.331 | 0.116 | 0.220 |
| H34 | 0.102 | -0.074 | -0.021 | -0.105 | 1.112 | 0.229 | -0.031 | 0.230 | 0.170 |
| H35 | 0.069 | 0.071 | 0.080 | 0.053 | 0.013 | -0.019 | 0.026 | -0.023 | -0.040 |
| H36 | 0.078 | -0.049 | 0.088 | -0.062 | 0.008 | 0.062 | 0.080 | 0.034 | -0.046 |
| H37 | -0.122 | 0.021 | 0.076 | 0.073 | 0.037 | -0.027 | 0.092 | -0.022 | 0.066 |
| H38 | -0.017 | -0.006 | -0.162 | -0.033 | 0.050 | -0.035 | -0.141 | -0.020 | -0.056 |
| H39 | 0.088 | -0.002 | 0.015 | -0.007 | -0.158 | -0.020 | 0.028 | -0.008 | 0.069 |
| H40 | -0.032 | -0.021 | -0.112 | 0.003 | 0.061 | -0.002 | -0.131 | -0.013 | -0.084 |
| H41 | -0.097 | 0.050 | 0.075 | 0.007 | 0.031 | 0.007 | 0.110 | -0.011 | 0.056 |
| H42 | 0.007 | 0.020 | 0.025 | 0.037 | 0.056 | -0.053 | 0.021 | -0.015 | -0.050 |
| H43 | -0.191 | -0.000 | 0.054 | -0.000 | 0.096 | -0.020 | 0.043 | -0.021 | 0.055 |
| H44 | 0.063 | 0.000 | -0.057 | -0.017 | -0.025 | 0.078 | -0.029 | 0.126 | 0.008 |
| H45 | 0.029 | -0.0080 | -0.015 | 0.059 | -0.118 | -0.094 | 0.008 | -0.113 | 0.073 |
| H46 | -0.043 | -0.044 | -0.074 | -0.038 | 0.052 | -0.081 | -0.055 | -0.077 | -0.020 |
| H47 | 0.040 | 0.054 | 0.012 | 0.007 | -0.140 | -0.058 | 0.018 | -0.069 | 0.085 |
| H48 | 0.055 | -0.006 | 0.044 | 0.0087 | 0.016 | 0.110 | 0.031 | 0.134 | -0.055 |

**Table S2:** Calculated Born effective charge tensor of ferroelectric DIPAB calculated by using density functional perturbation theory.

| Atomic species |  |  |  |  |  |  |  |  |  |
| --- | --- | --- | --- | --- | --- | --- | --- | --- | --- |
| Br1 | -1.242 | 0.077 | 0.103 | 0.046 | -1.345 | 0.057 | 0.114 | 0.023 | -0.917 |
| Br2 | -1.242 | -0.077 | 0.103 | -0.046 | -1.345 | -0.057 | 0.114 | -0.023 | -0.917 |
| N3 | -0.791 | -0.087 | 0.109 | -0.101 | -0.847 | 0.132 | 0.078 | 0.085 | -0.745 |
| N4 | -0.791 | 0.088 | 0.109 | 0.101 | -0.847 | -0.132 | 0.078 | -0.085 | -0.745 |
| C5 | 0.391 | -0.089 | 0.255 | -0.092 | 0.368 | -0.093 | 0.345 | -0.134 | 0.613 |
| C6 | 0.136 | 0.038 | -0.045 | 0.017 | -0.069 | 0.000 | -0.055 | 0.017 | 0.047 |
| C7 | 0.122 | 0.021 | -0.040 | 0.040 | 0.048 | -0.032 | -0.064 | -0.057 | -0.043 |
| C8 | 0.352 | -0.047 | -0.108 | -0.066 | 0.302 | 0.235 | -0.143 | 0.29389 | 0.763 |
| C9 | 0.039 | 0.005 | -0.022 | 0.046 | 0.113 | -0.091 | -0.070 | -0.060 | -0.127 |
| C10 | -0.029 | 0.007 | 0.040 | 0.018 | 0.159 | -0.070 | 0.052 | -0.035 | 0.025 |
| C11 | 0.391 | 0.089 | 0.255 | 0.092 | 0.368 | 0.093 | 0.345 | 0.134 | 0.613 |
| C12 | 0.136 | -0.038 | -0.045 | -0.017 | -0.069 | -0.000 | -0.055 | -0.017 | 0.047 |
| C13 | 0.122 | -0.021 | -0.040 | -0.040 | 0.048 | 0.032 | -0.064 | 0.057 | -0.043 |
| C14 | 0.352 | 0.047 | -0.108 | 0.066 | 0.302 | -0.235 | -0.143 | -0.293 | 0.763 |
| C15 | 0.039 | -0.005 | -0.022 | -0.046 | 0.113 | 0.090 | -0.069 | 0.060 | -0.127 |
| C16 | -0.029 | -0.007 | 0.040 | -0.018 | 0.159 | 0.070 | 0.052 | 0.035 | 0.025 |
| H17 | 1.001 | 0.264 | -0.320 | 0.256 | 0.182 | -0.097 | -0.315 | -0.109 | 0.209 |
| H18 | 0.101 | 0.031 | -0.017 | 0.110 | 1.147 | -0.242 | -0.034 | -0.206 | 0.162 |
| H19 | 0.073 | -0.081 | 0.084 | -0.055 | 0.010 | 0.018 | 0.034 | 0.030 | -0.044 |
| H20 | 0.087 | 0.055 | 0.081 | 0.061 | 0.010 | -0.058 | 0.071 | -0.036 | -0.044 |
| H21 | -0.125 | -0.016 | 0.075 | -0.073 | 0.036 | 0.026 | 0.094 | 0.018 | 0.064 |
| H22 | -0.014 | 0.009 | -0.165 | 0.035 | 0.047 | 0.036 | -0.144 | 0.023 | -0.054 |
| H23 | 0.090 | 0.007 | 0.019 | 0.008 | -0.155 | 0.016 | 0.025 | 0.007 | 0.064 |
| H24 | -0.027 | 0.021 | -0.112 | -0.003 | 0.060 | 0.000 | -0.130 | 0.007 | -0.085 |
| H25 | -0.099 | -0.049 | 0.071 | -0.007 | 0.030 | -0.007 | 0.109 | 0.012 | 0.058 |
| H26 | 0.000 | -0.021 | 0.027 | -0.039 | 0.058 | 0.054 | 0.025 | 0.019 | -0.053 |
| H27 | -0.179 | 0.007 | 0.062 | 0.000 | 0.096 | 0.019 | 0.038 | 0.016 | 0.046 |
| H28 | 0.076 | 0.019 | -0.059 | 0.015 | -0.026 | -0.077 | -0.045 | -0.134 | 0.013 |
| H29 | 0.030 | 0.002 | -0.025 | -0.058 | -0.117 | 0.095 | 0.008 | 0.114 | 0.078 |
| H30 | -0.041 | 0.051 | -0.067 | 0.038 | 0.051 | 0.081 | -0.053 | 0.069 | -0.024 |
| H31 | 0.041 | -0.060 | 0.010 | -0.007 | -0.139 | 0.058 | 0.017 | 0.073 | 0.084 |
| H32 | 0.047 | 0.017 | 0.044 | -0.006 | 0.016 | -0.111 | 0.040 | -0.141 | -0.053 |
| H33 | 1.001 | -0.264 | -0.320 | -0.256 | 0.182 | 0.097 | -0.315 | 0.109 | 0.209 |
| H34 | 0.101 | -0.031 | -0.017 | -0.110 | 1.147 | 0.242 | -0.034 | 0.206 | 0.162 |
| H35 | 0.073 | 0.081 | 0.084 | 0.055 | 0.010 | -0.018 | 0.034 | -0.030 | -0.044 |
| H36 | 0.087 | -0.055 | 0.081 | -0.061 | 0.010 | 0.058 | 0.071 | 0.036 | -0.044 |
| H37 | -0.125 | 0.016 | 0.075 | 0.073 | 0.036 | -0.026 | 0.094 | -0.018 | 0.064 |
| H38 | -0.014 | -0.009 | -0.165 | -0.035 | 0.047 | -0.036 | -0.144 | -0.023 | -0.054 |
| H39 | 0.090 | -0.007 | 0.019 | -0.008 | -0.155 | -0.016 | 0.025 | -0.007 | 0.064 |
| H40 | -0.027 | -0.021 | -0.112 | 0.003 | 0.060 | -0.000 | -0.130 | -0.007 | -0.085 |
| H41 | -0.099 | 0.049 | 0.071 | 0.007 | 0.030 | 0.007 | 0.109 | -0.012 | 0.058 |
| H42 | 0.000 | 0.021 | 0.027 | 0.039 | 0.058 | -0.054 | 0.025 | -0.019 | -0.053 |
| H43 | -0.179 | -0.007 | 0.062 | -0.000 | 0.096 | -0.019 | 0.038 | -0.016 | 0.046 |
| H44 | 0.076 | -0.019 | -0.059 | -0.015 | -0.026 | 0.077 | -0.045 | 0.133 | 0.013 |
| H45 | 0.030 | -0.002 | -0.025 | 0.058 | -0.117 | -0.095 | 0.008 | -0.114 | 0.078 |
| H46 | -0.041 | -0.051 | -0.067 | -0.038 | 0.051 | -0.081 | -0.053 | -0.069 | -0.024 |
| H47 | 0.041 | 0.060 | 0.010 | 0.007 | -0.139 | -0.058 | 0.017 | -0.073 | 0.084 |
| H48 | 0.047 | -0.017 | 0.044 | 0.006 | 0.016 | 0.111 | 0.040 | 0.141 | -0.053 |

1. **Derivation Of Polarization, Piezoelectric and Elastic Tensors of Hessian matrix Of DIPAB**

We shortly discuss below the calculations of polarization and piezoelectric response tensors of the crystal in the framework of Born-Oppenheimer approximation [[66-68](#_ENREF_66)] which allows separation of the electronic and atomic motion. The macroscopic polarization in the presence of strain or external electric field includes three contributions, where is the zero field spontaneous polarization of the relaxed structure , is induced by lattice response and is the electronic screening polarization [[69](#_ENREF_69)]. By using Voigt notation, and can be expressed as

(S.1)

(S.2)

Where is the electronic dielectric tensor, and is the clamped–ion component of the piezoelectric tensor, and is the dynamical Born effective charge tensor:

(S.3)

Similarly, static dielectric tensor calculations can be evaluated by decomposing it into three contributions

(S.4)

Where besides pure electronic dielectric screening . The strain field and the atomic displacement are related to the screened field **E** by ,

(S.5)

and vanishing Hellmann-Feynman forces,

(S.6)

Eqs. (S.7) and (S.8) are the elastic constants

(S.7)

The piezoelectric tensor

(S.8)

and the harmonic force constants and internal strain parameters

, (S.9)

By following the procedure of [[27](#_ENREF_27)], we obtained:

= (S.10)

Where are the harmonic force constants, and elastic tensor, are calculated as

, (S.11)

The first term in Eq. (S.11) is due to atomic displacements at fixed lattice parameter; the second represents the piezoelectricity due to lattice constant changes and the third is the electronic dielectric. Thus, these parameters can be calculated using DFT and the parameterized Hamiltonian can be applied to the realistic nanostructured systems consisting of hundreds of thousands of atoms [[70](#_ENREF_70), [71](#_ENREF_71)].
